# Supplementary material for: Cardanol benzoxazines – interplay of oxazine functionality (mono to tetra) and properties
Source: Royal Society of Chemistry journal article supplement (doi:10.1039/c5ra14214h), 2015-01-01
Supplement: c5ra14214h1.pdf [file c5ra14214h1.pdf]

## Supplementary data

### Cardanol Benzoxazines – Interplay of Oxazine Functionality (Mono to Tetra) and Properties

Swapnil Shukla,<sup>a</sup> Arup Mahata,<sup>b</sup> Biswarup Pathak<sup>b</sup> and Bimlesh Lochab<sup>a†</sup>

<sup>a</sup>Department of Chemistry, School of Natural Sciences, Shiv Nadar University, Gautam Budh Nagar, Uttar Pradesh 203207, India.

<sup>b</sup>Discipline of Chemistry, School of Basic Sciences, Indian Institute of Technology (IIT) Indore, M. P., India.

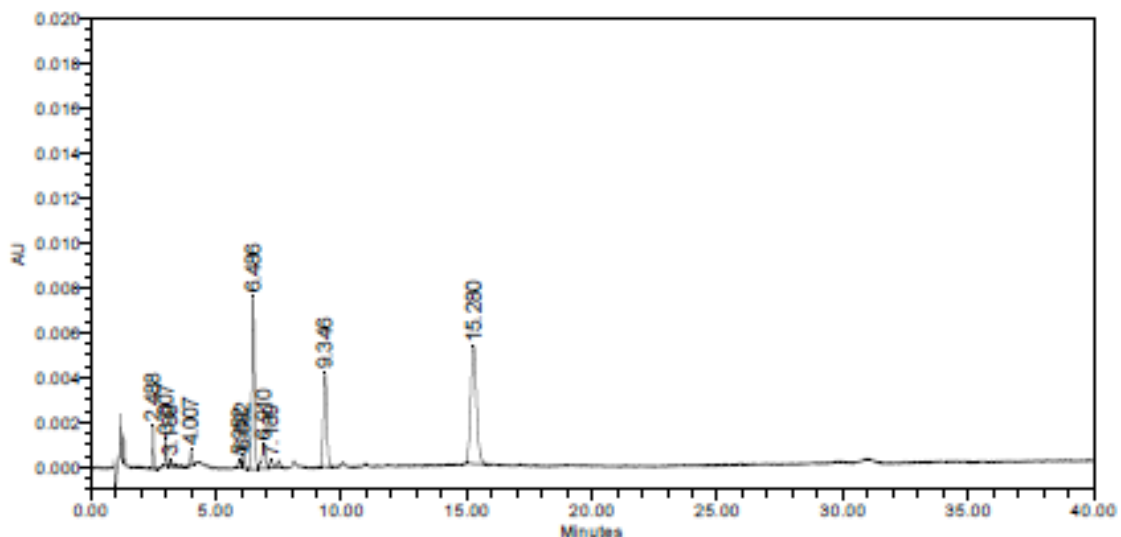

|    | Peak Name | RT    | Area  | % Area |
|----|-----------|-------|-------|--------|
| 1  | Peak1     | 2.488 | 5393  | 2.47   |
| 2  | Peak2     | 3.007 | 4036  | 1.85   |
| 3  | Peak3     | 3.188 | 3710  | 1.70   |
| 4  | Peak4     | 4.007 | 3626  | 1.66   |
| 5  | Peak5     | 5.952 | 1654  | 0.76   |
| 6  | Peak6     | 6.082 | 4591  | 2.10   |
| 7  | Peak7     | 6.486 | 53418 | 24.47  |
| 8  | Peak8     | 6.910 | 11384 | 5.21   |
| 9  | Peak9     | 7.189 | 5709  | 2.61   |
| 10 | Peak10    | 9.346 | 40109 | 18.37  |

|    | Peak Name | RT     | Area  | % Area |
|----|-----------|--------|-------|--------|
| 11 | Peak11    | 15.280 | 84683 | 38.79  |

Figure S1. HPLC chromatogram of cardanol (peak at retention time 6.5, 9.3 and 15.2 minutes are due to cardanol mono-, di- and tri-ene component) [Column: Grace Alltima C18, 150 x 4.6 mm Mobile phase: 80:20:1 Acetonitrile: Water: Acetic acid; Flow rate: 1.5 mL/min; UV detection at 280 nm].

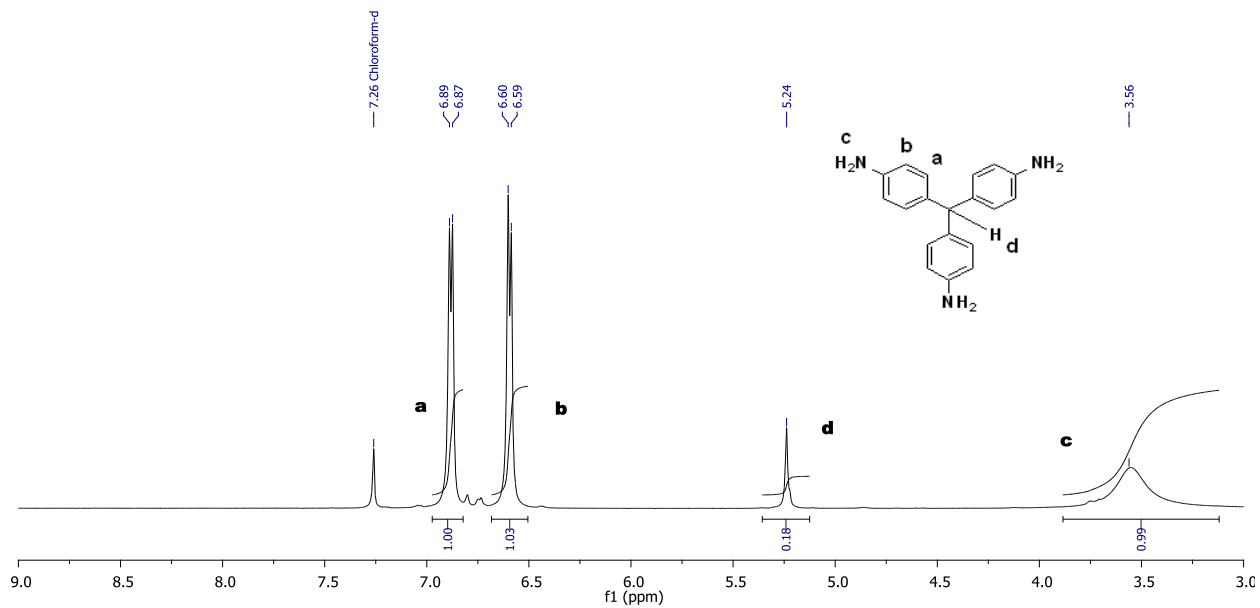

Figure S2.  $^1\text{H-NMR}$  spectrum of TrisAPM in  $\text{CDCl}_3$ .

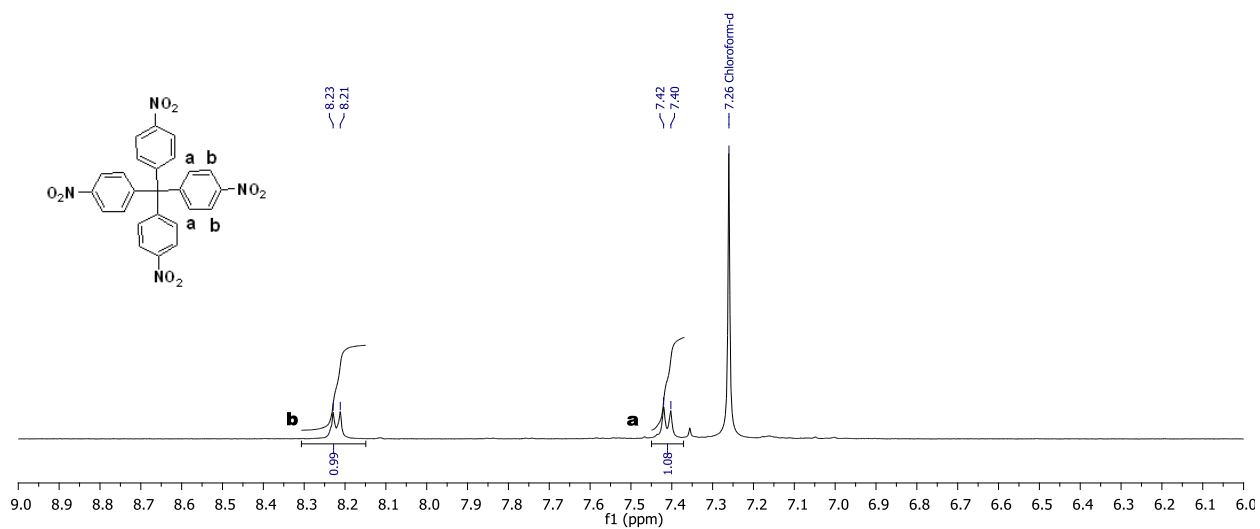

Figure S3.  $^1\text{H-NMR}$  spectrum of TNPM in  $\text{CDCl}_3$ .

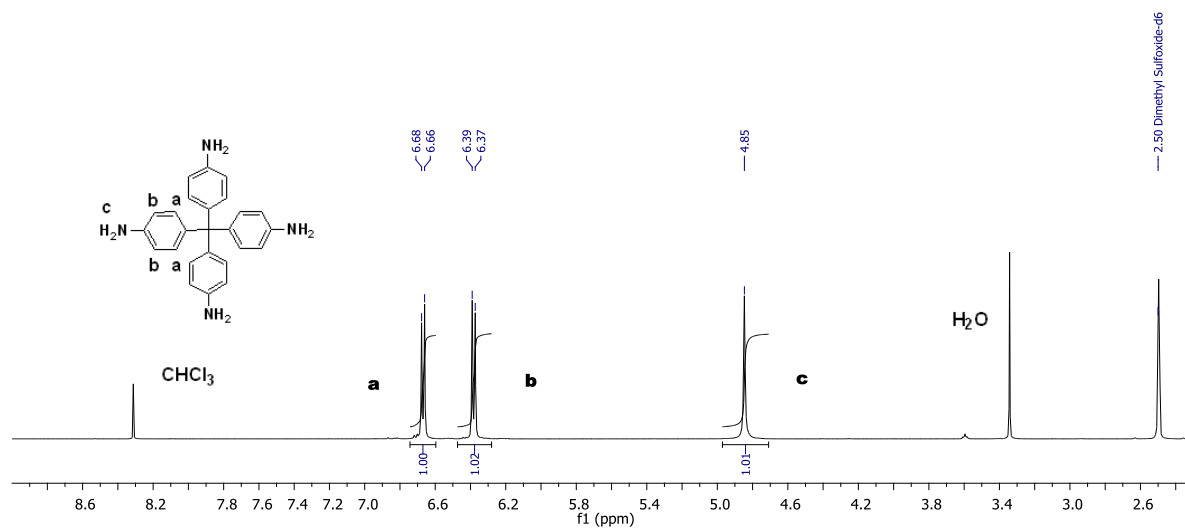

Figure S4.  $^1\text{H-NMR}$  spectrum of TAPM in  $(\text{CD}_3)_2\text{SO}$ .

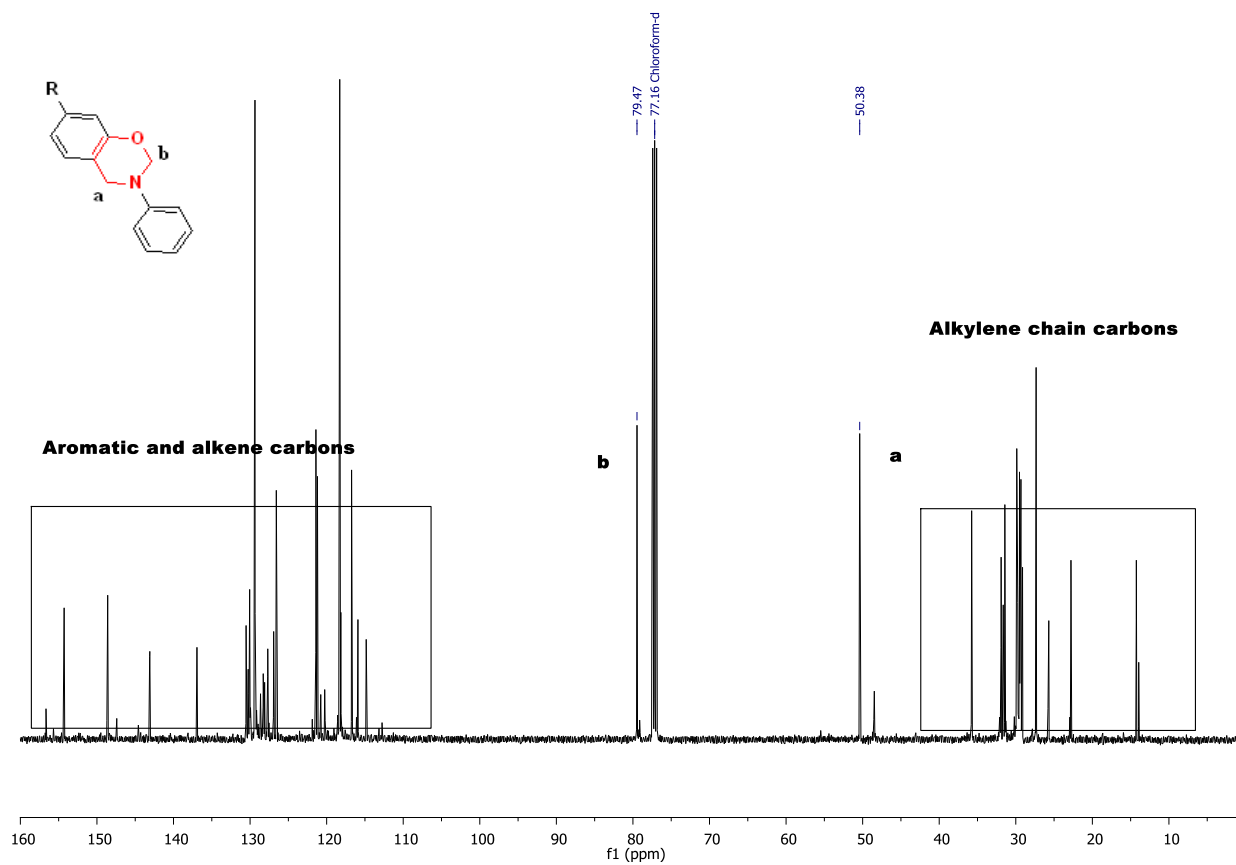

Figure S5.  $^{13}\text{C-NMR}$  spectrum of C-a in  $\text{CDCl}_3$

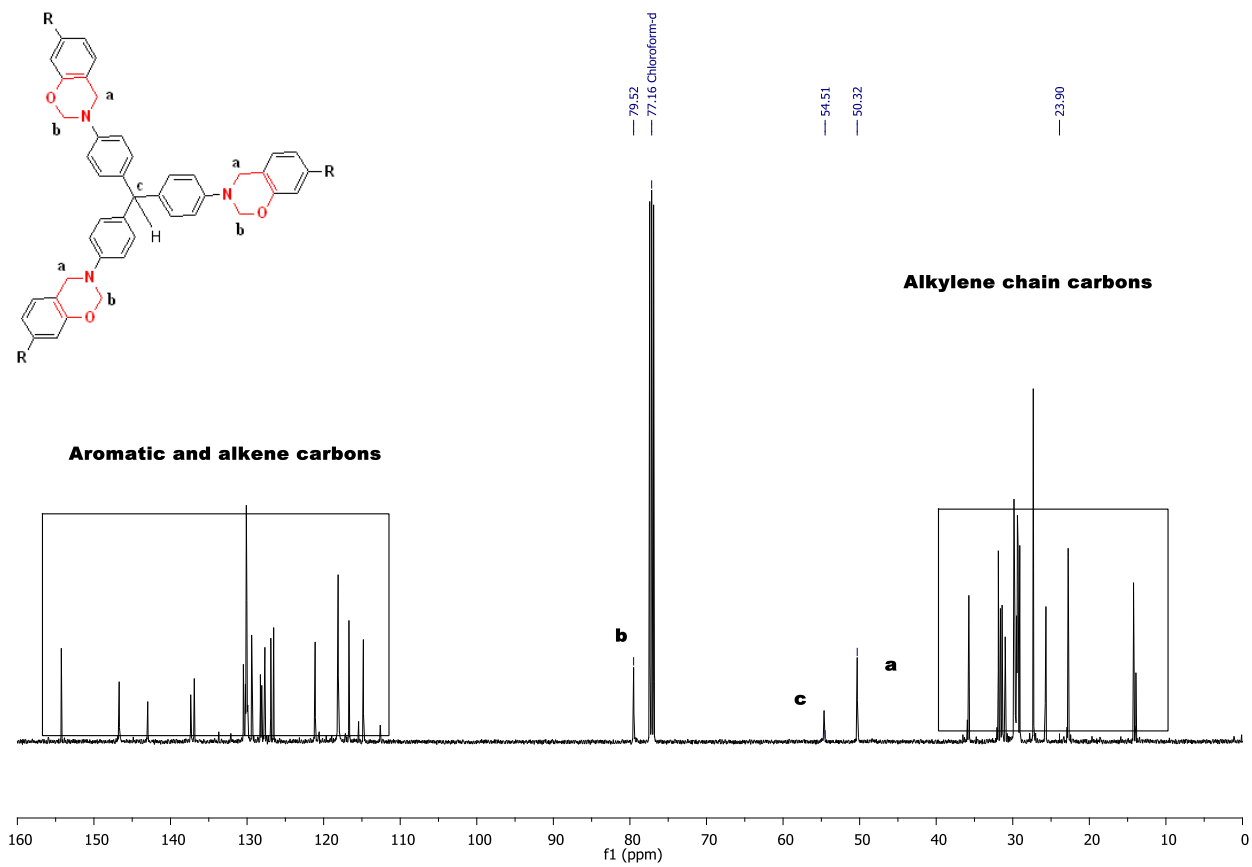

Figure S6.  $^{13}\text{C}$ -NMR spectrum of C-trisapm in  $\text{CDCl}_3$

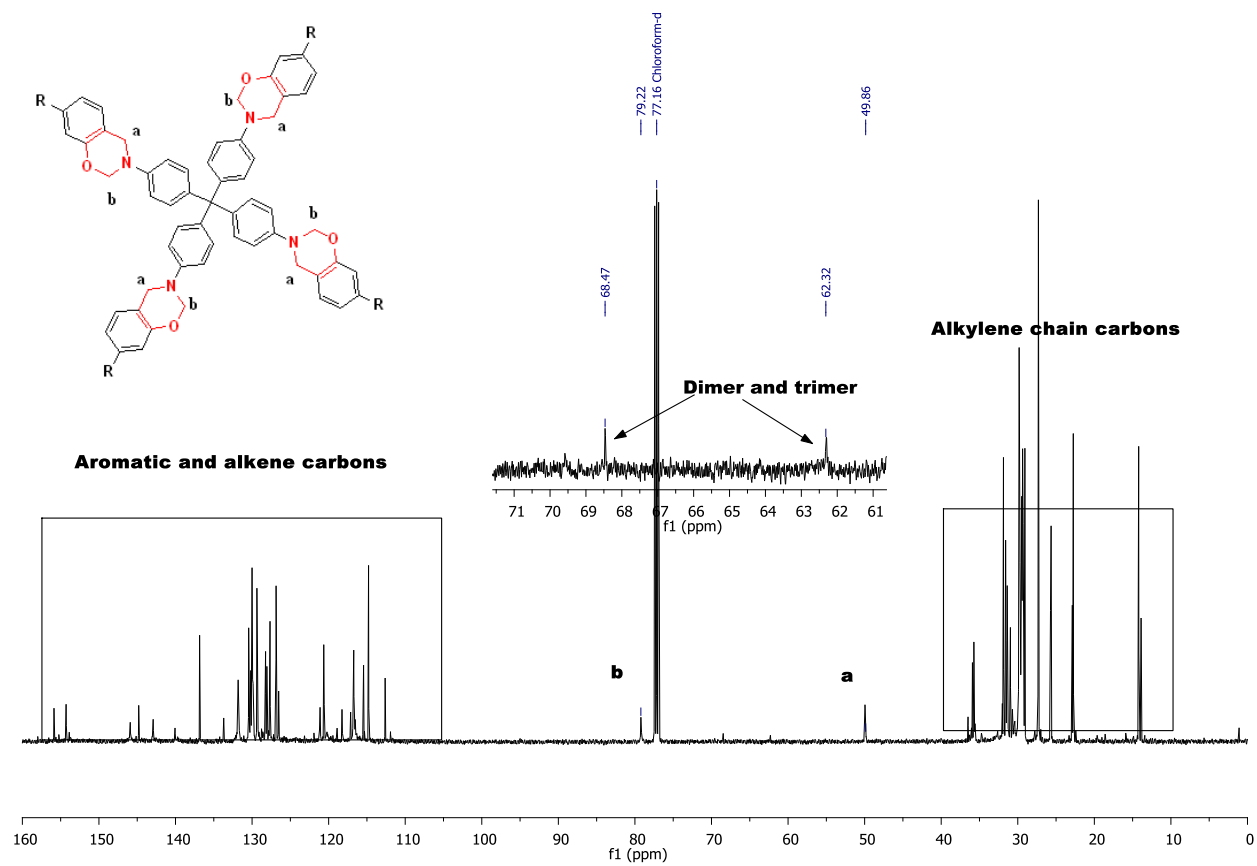

Figure S7.  $^{13}\text{C}$ -NMR spectra of C-tetraapm in  $\text{CDCl}_3$

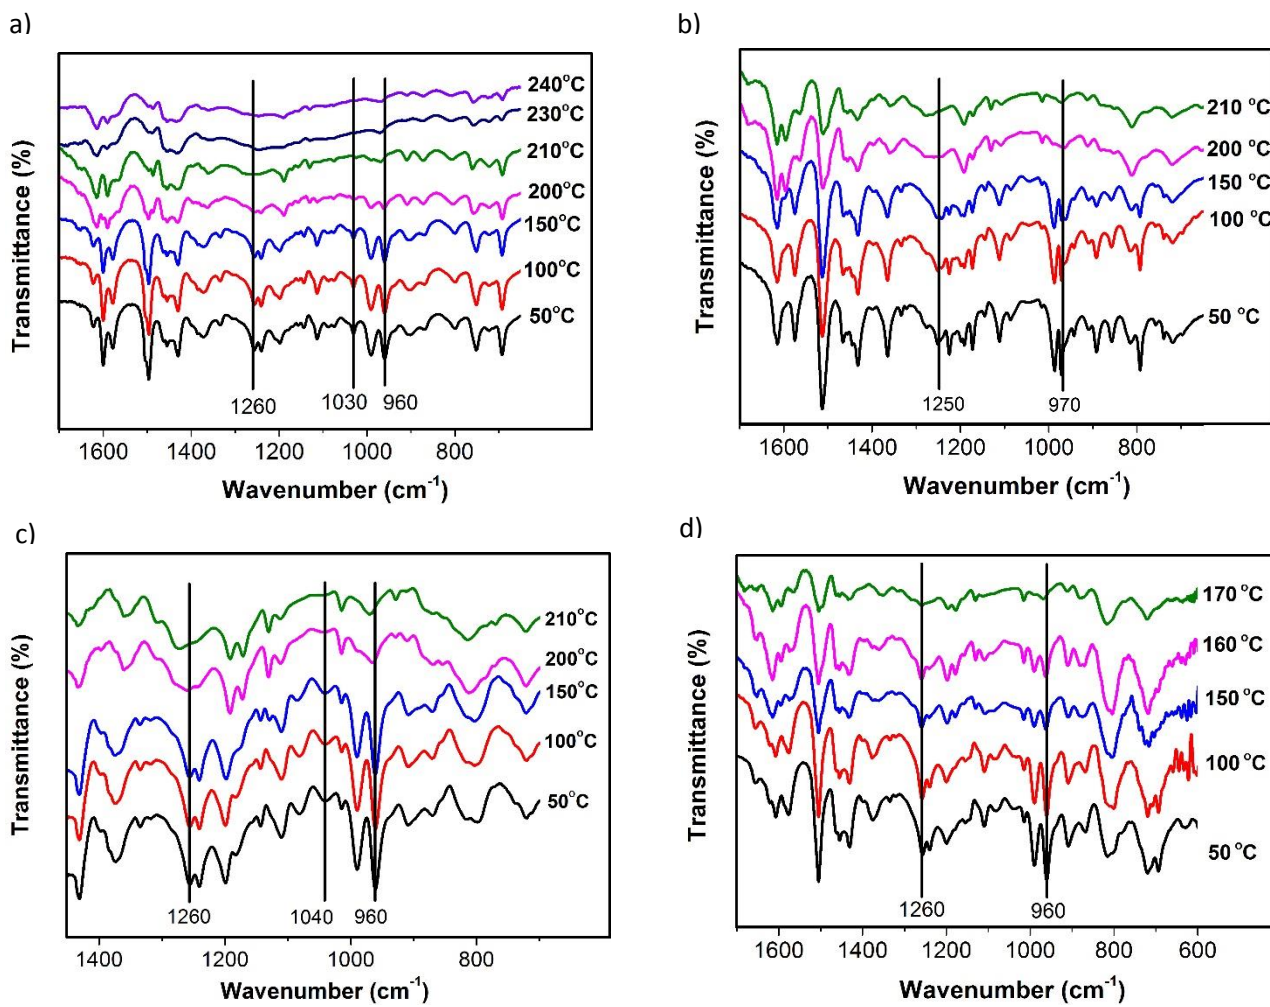

Figure S8. FT-IR spectra of non-isothermally cured monomers a) C-a b) C-ddm c) C-trisapm  
d) C-tetraapm.

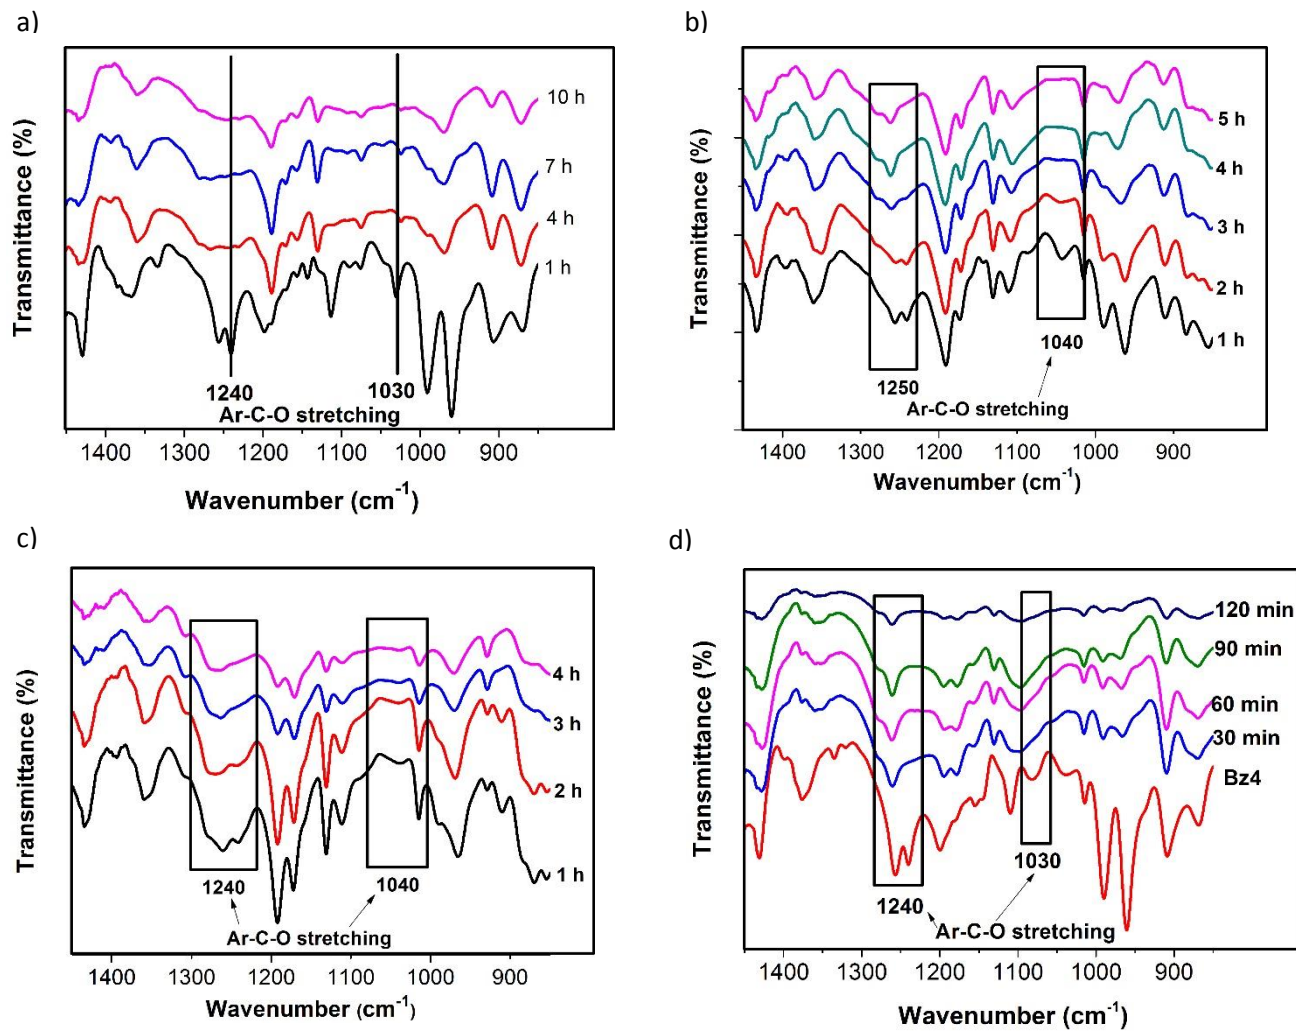

Figure S9. FT-IR spectra of isothermally cured (180 °C) Bz monomers a) C-a b) C-ddm c) C-trisapm d) C-tetraapm.
